# Supplementary material for: Imidazolines containing single-, twin- and triple-tailed hydrophobes and hydrophilic pendants (CH2CH2NH)nH as inhibitors of mild steel corrosion in CO2–0.5 M NaCl
Source: Royal Society of Chemistry journal article supplement (doi:10.1039/c5ra21276f), 2016-01-01
Supplement: c5ra21276f1.pdf [file c5ra21276f1.pdf]

**Imidazolines containing single-, twin- and triple-tailed hydrophobes  
and hydrophilic pendants  $(\text{CH}_2\text{CH}_2\text{NH})_n\text{H}$  as inhibitors of mild steel  
corrosion in  $\text{CO}_2$ -0.5 M NaCl**

Mohammad A. J. Mazumder<sup>1\*</sup>, Mazen K. Nazal<sup>1</sup>, Mohamed Faiz<sup>2</sup>, Shaikh A. Ali<sup>1</sup>

<sup>1</sup>Chemistry Department, <sup>2</sup>Physics Department, King Fahd University of Petroleum and Minerals,  
Dhahran 31261, Saudi Arabia

\*Corresponding author

*E mail address:* [jafar@kfupm.edu.sa](mailto:jafar@kfupm.edu.sa) (M. A. Jafar Mazumder).

Tel.: +966-13-860-7836; Fax: +966-13-860-4277.

Home Page: <http://faculty.kfupm.edu.sa/CHEM/jafar/>

## Supplementary Materials

### 2. Experimental

#### 2.3. Synthesis

**2.3.1.1. General procedure for the synthesis of di-, and tri-octyloxybenzamides (3b, 3c).** A mixture of alkoxybenzoic acid (**2b** or **2c**) (60 mmol) in  $\text{SOCl}_2$  (17  $\text{cm}^3$ ) was heated to 80 °C for 30 min. After removal of the excess  $\text{SOCl}_2$ , the residual liquid was added drop wise to a 30%  $\text{NH}_3$  solution (150  $\text{cm}^3$ ) at 0 °C. The benzamide (**3b** or **3c**) was filtered and dried.

**2.3.1.1. 3, 5-Dioctyloxybenzamide (3b).** Yield: 88%; Mp 85-86°C. (Found: C, 73.0; H, 10.2; N, 3.6.  $\text{C}_{23}\text{H}_{39}\text{NO}_3$  requires C, 73.17; H, 10.41; N, 3.71%).  $\nu_{\text{max}}$  (KBr) 3383, 3203, 2923, 2854, 1649, 1597, 1466, 1435, 1389, 1254, 1169, 1119, 1058, 847, and 682  $\text{cm}^{-1}$ .  $\delta_{\text{H}}$  ( $\text{CDCl}_3$ ) 0.88 (6H, t,  $J$  7.0 Hz), 1.30 (16H, m), 1.43 (4H, m), 1.76 (4H, m), 3.96 (4H, t,  $J$  6.7 Hz), 6.10 (2H, br), 6.59 (1H, s), 6.91 (2H, s).  $\delta_{\text{C}}$  ( $\text{CDCl}_3$ , 45 °C): 14.08 (2C), 22.66 (2C), 25.98 (2C), 29.15 (2C), 29.21 (2C), 29.30 (2C), 31.78 (2C), 68.32 (2C), 104.87, 105.63 (2C), 135.30, 160.37 (2C), 169.51.

**2.3.1.2. 3, 4, 5-Trioctyloxybenzamide (3c).** Yield: 90%; Mp 84-85 °C. (Found: C, 73.4; H, 10.8; N, 2.7.  $\text{C}_{31}\text{H}_{55}\text{NO}_4$  requires C, 73.62; H, 10.96; N, 2.77%).  $\nu_{\text{max}}$  (KBr) 3358, 3192, 2921, 2851, 1648, 1580, 1465, 1428, 1382, 1317, 1237, 1122, 1017, 852, and 691  $\text{cm}^{-1}$ .  $\delta_{\text{H}}$  ( $\text{CDCl}_3$ ) 0.88 (9H, t,  $J$  7.0 Hz), 1.30 (24H, m), 1.45 (6H, m), 1.74 (2H, m), 1.81 (4H, m), 4.00 (6H, t,  $J$  6.7 Hz), 6.00 (2H, br), 7.01 (2H, s).  $\delta_{\text{C}}$  ( $\text{CDCl}_3$ ): 14.08 (3C), 22.65 (3C), 26.03 (3C),

29.26 (3C), 29.32 (3C), 29.49 (2C), 30.28, 31.80 (2C), 31.87, 69.31 (2C), 73.49, 106.04 (2C), 128.14, 141.51, 153.02 (2C), 169.37.

**2.3.2. General procedure for the synthesis of di-, and tri-alkoxybenzonnitriles (4b, 4c).** A mixture of octyloxybenzamide (**3b** or **3c**) (45 mmol) in  $\text{SOCl}_2$  (70 mmol) in benzene (20  $\text{cm}^3$ ) was heated to 80 °C for 1 h or until the reaction was complete as indicated by TLC experiment (silica,  $\text{Et}_2\text{O}/\text{MeOH}$  9:1). After removal of the excess  $\text{SOCl}_2$ , the residual liquid was crystallized from pentane to give the benzonitrile (**4b** or **4c**).

**2.3.2.1. 3, 5-Dioctyloxybenzonitrile (4b).** Yield: 85%; (Found: C, 76.5; H, 10.5; N, 3.8.  $\text{C}_{23}\text{H}_{37}\text{NO}_2$  requires C, 76.83; H, 10.37; N, 3.90%).  $\nu_{\text{max}}$  (KBr) 2926, 2854, 2230, 1590, 1442, 1386, 1349, 1299, 1255, 1173, 1056, 845, 723, and 677  $\text{cm}^{-1}$ .  $\delta_{\text{H}}$  ( $\text{CDCl}_3$ ) 0.89 (6H, t,  $J$  7.0 Hz), 1.30 (16H, m), 1.43 (4H, m), 1.77 (4H, m), 3.93 (4H, t,  $J$  6.7 Hz), 6.63 (1H,s), 6.73 (2H, s).  $\delta_{\text{C}}$  ( $\text{CDCl}_3$ ): 14.07 (2C), 22.63 (2C), 25.92 (2C), 28.99 (2C), 29.18 (2C), 29.25 (2C), 31.77 (2C), 68.82 (2C), 106.45, 110.19 (2C), 113.18, 118.90, 160.44 (2C).

**2.3.2.2. 3,4,5-Trioctyloxybenzonitrile (4c).** Yield: 87%; Mp 39-40 °C; (Found: C, 76.1; H, 10.8; N, 2.7.  $\text{C}_{31}\text{H}_{53}\text{NO}_3$  requires C, 76.34; H, 10.95; N, 2.87%).  $\nu_{\text{max}}$  (KBr) 2922, 2852, 2225, 1581, 1502, 1467, 1428, 1386, 1339, 1240, 1129, 1019, 977, 837, 815, 723, and 624  $\text{cm}^{-1}$ .  $\delta_{\text{H}}$  ( $\text{CDCl}_3$ ) 0.89 (9H, overlapping t,  $J$  7.0 Hz), 1.31 (24H, m), 1.45 (6H, m), 1.73 (2H, m), 1.80 (4H, m), 3.96 (4H, t,  $J$  6.7 Hz), 4.00 (2H, t,  $J$  6.5 Hz), 6.81 (2H,s).  $\delta_{\text{C}}$  ( $\text{CDCl}_3$ ): 14.11 (3C), 22.68

(3C), 26.02 (3C), 29.17 (2C), 29.27 (3C), 29.31 (2C), 29.48, 30.29, 31.82 (2C), 31.90, 69.40 (2C), 73.72, 106.17, 110.45 (2C), 118.90, 142.30, 153.46 (2C).

**2.3.3.1. 1-(2-Aminoethyl)-2-(3,5-dioctyloxyphenyl)-2-imidazoline (7b).** Yield: 87%;  $\nu_{\max}$ . (neat) 3450, 3283, 2925, 2855, 1585, 1438, 1408, 1386, 1344, 1287, 1167, 1056, 1003, 837, and 735  $\text{cm}^{-1}$ .  $\delta_{\text{H}}$  ( $\text{CDCl}_3$ ): 0.89 (6H, t,  $J$  6.7 Hz), 1.20-1.50 (22 H, m), 1.76 (4H, m), 2.84 (2H, t,  $J$  6.1 Hz), 3.13 (2H, t,  $J$  6.1 Hz), 3.43 (2H, t,  $J$  9.8 Hz), 3.89 (2H, t,  $J$  9.8 Hz), 3.96 (4H, t,  $J$  6.4 Hz), 6.49 (1H, s), 7.31 (2H, s).  $\delta_{\text{C}}$  ( $\text{CDCl}_3$ ): 13.96 (2C), 22.51 (2C), 25.37 (2C), 29.05 (2C), 29.09 (2C), 29.18 (2C), 31.66 (2C), 40.87, 51.21, 52.49, 53.30, 68.07 (2C), 102.97, 106.39 (2C) 133.03, 160.05 (2C), 168.01.

**2.3.3.2. 1-(2-Aminoethyl)-2-(3,4,5-trioctyloxyphenyl)-2-imidazoline (7c).** Yield: 95%;  $\nu_{\max}$ . (neat) 3290, 2926, 2854, 1577, 1503, 1466, 1425, 1380, 1340, 1234, 1114, 1006, 841 and 722  $\text{cm}^{-1}$ .  $\delta_{\text{H}}$  ( $\text{CDCl}_3$ ): 0.89 (9H, t,  $J$  6.7 Hz), 1.20-1.50 (32 H, m), 1.72 (2H, m), 1.79 (4H, m), 2.86 (2H, t,  $J$  6.1 Hz), 3.15 (2H, t,  $J$  6.1 Hz), 3.45 (2H, t,  $J$  9.8 Hz), 3.89 (2H, t,  $J$  9.8 Hz), 3.96 (6H, m), 6.77 (2H, s).  $\delta_{\text{C}}$  ( $\text{CDCl}_3$ ): 14.12 (3C), 22.08 (3C), 26.08 (3C), 29.30 (5C), 29.36 (2C), 29.54, 30.29, 31.18 (2C), 31.91, 41.09, 51.57, 52.93, 53.41, 69.19 (2C), 73.44, 106.78 (2C), 126.17, 139.37, 153.02 (2C), 168.30.

**2.3.4.1. 1-[2-{2-(2-Aminoethylamino)ethylamino}ethyl] -2-(3, 5-dioctyloxyphenyl)-2-imidazoline (8b).** Yield: 88%.  $\nu_{\max}$ . (neat) 3287, 2926, 2855, 1586, 1459, 1439, 1385, 1344, 1164, 1052, 835, and 724  $\text{cm}^{-1}$ .  $\delta_{\text{H}}$  ( $\text{CDCl}_3$ ): 0.89 (6H, t,  $J$  6.7 Hz), 1.20-1.65 (24H, m), 1.75 (4H,

m), 2.68 (2H, t,  $J$  5.7 Hz), 2.74 (4H, s), 2.78 (2H, t,  $J$  6.5 Hz), 2.81 (2H, t,  $J$  6.1 Hz), 3.19 (2H, t,  $J$  6.4 Hz), 3.42 (2H, t,  $J$  9.7 Hz), 3.93 (2H, t,  $J$  9.7 Hz), 3.97 (4H, t,  $J$  6.4 Hz), 6.48 (1H, s), 6.66 (2H, s).  $\delta_C$  (CDCl<sub>3</sub>): 14.11 (2C), 22.66 (2C), 26.02 (2C), 29.24 (2C), 29.33 (2C), 31.38 (2C), 31.82 (2C), 41.77, 48.50, 49.30, 49.62, 49.81, 51.50, 52.51, 53.41, 68.20 (2C), 103.12, 106.55 (2C), 133.11, 160.17 (2C), 168.07.

**2.3.4.2. 1-[2-{2-(2-Aminoethylamino)ethylamino}ethyl] -2-(3,4,5-trioctyloxyphenyl)-2-imidazoline (8c).** Yield: 92%.  $\nu_{\max}$ . (neat) 3287, 2926, 2855, 1576, 1501, 1466, 1426, 1379, 1341, 1234, 1114, 1007, 957, 843, and 722 cm<sup>-1</sup>.  $\delta_H$  (CDCl<sub>3</sub>): 0.89 (9H, t,  $J$  6.7 Hz), 1.20-1.65 (34H, m), 1.75 (6H, m), 2.66 (2H, t,  $J$  5.8 Hz), 2.72 (4H, s), 2.77 (2H, t,  $J$  6.7 Hz), 2.79 (2H, t,  $J$  6.0 Hz), 3.21 (2H, t,  $J$  6.4 Hz), 3.45 (2H, t,  $J$  9.7 Hz), 3.88 (2H, t,  $J$  9.7 Hz), 3.97 (6H, t,  $J$  6.4 Hz), 6.78 (2H, s).  $\delta_C$  (CDCl<sub>3</sub>): 14.12 (3C), 22.68 (2C), 22.70, 26.04 (3C), 29.30 (3C), 29.36 (2C), 29.38 (2C), 29.55, 30.30, 31.84 (2C), 31.91, 41.80, 48.62, 49.35, 49.66, 50.09, 51.66, 52.53, 53.39, 69.12 (2C), 73.39, 106.75 (2C), 126.18, 139.33, 152.97 (2C), 168.16.
